# Supplementary material
Source: publisher site journal article supplement (https://www.dovepress.com/article/395474)

**Fig S1.** Authentication of PDX models, XDOTS models with original tumors by short tandem repeat analysis.

**246 Primary Tumor**

**408 Primary Tumor**

**504 Primary Tumor**

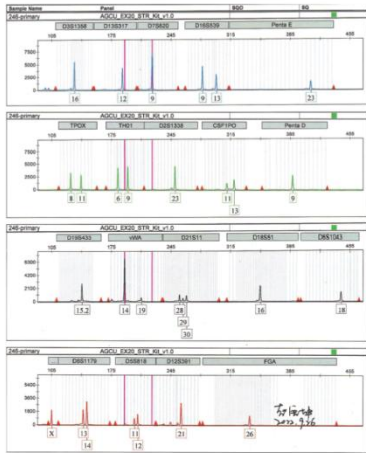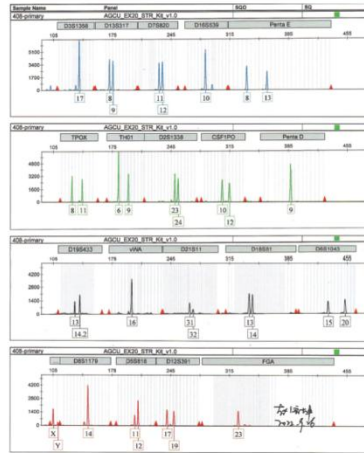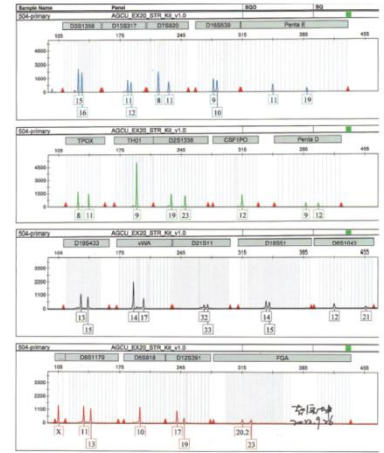

**246 PDX**

**408 PDX**

**504 PDX**

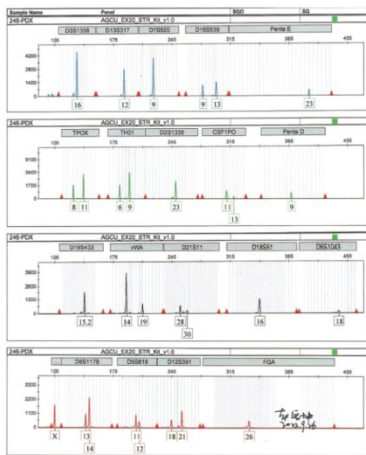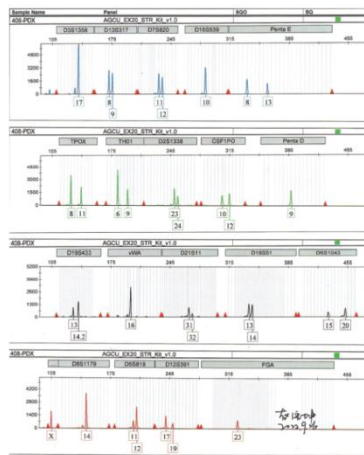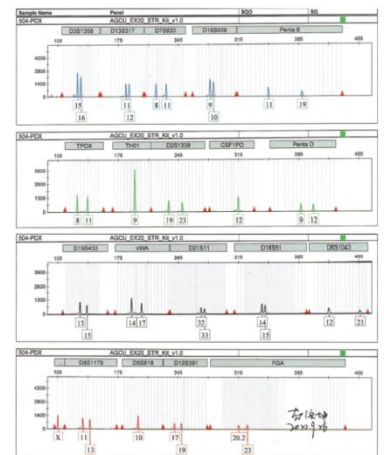

**246 XDOTS**

**408 XDOTS**

**504 XDOTS**

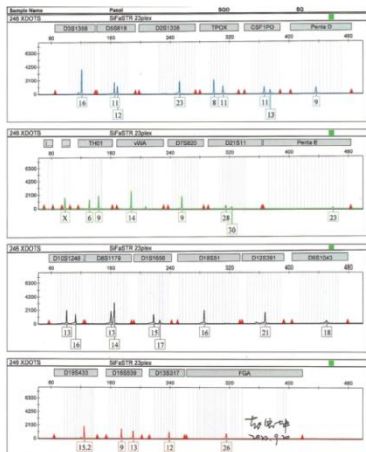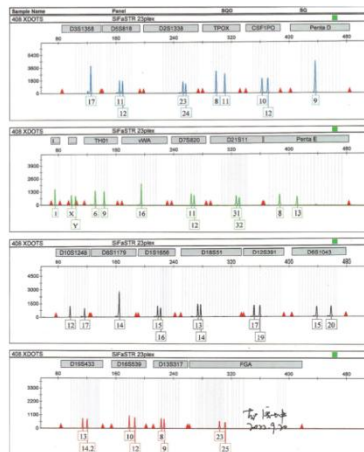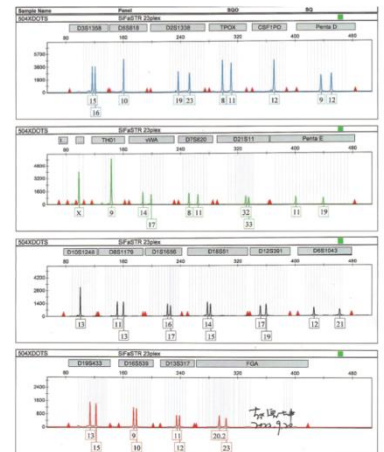

Supplement: Supplementary file 1 [file get_supplementary_file.php]
